# Supplementary material for: Enhancer identification in mouse embryonic stem cells using integrative modeling of chromatin and genomic features
Source: PubMed Central journal article supplement (PMC3406964; doi:10.1186/1471-2164-13-152), 2012-04-26

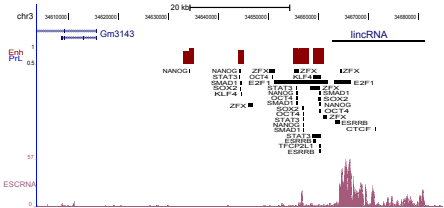

Supplement: 1471-2164-13-152-S6.pdf [file 1471-2164-13-152-S6.pdf]
